# Supplementary material for: Integration of paper-based analytical devices with digital microfluidics for colorimetric detection of creatinine
Source: Royal Society of Chemistry journal article supplement (doi:10.1039/d4an00688g), 2024-10-08
Supplement: d4an00688g1.pdf [file d4an00688g1.pdf]

## Data Availability for

# Integration of paper-based analytical devices with digital microfluidics for colorimetric detection of creatinine

Larissa G. Velasco<sup>a</sup>, Danielly S. Rocha<sup>a</sup>, Richard P. S. de Campos<sup>b</sup> and Wendell K. T. Coltro<sup>\*a,c</sup>

<sup>a</sup>Instituto de Química, Universidade Federal de Goiás - UFG, 74690-900, Goiânia, GO, Brazil

<sup>b</sup>Nanotechnology Research Centre, National Research Council of Canada, Edmonton, AB, Canada

<sup>c</sup>Instituto Nacional de Ciência e Tecnologia de Bioanalítica, 13084-971, Campinas, SP, Brazil

### **\*Corresponding author:**

Prof. Dr. Wendell K. T. Coltro

Instituto de Química, Universidade Federal de Goiás

Campus Samambaia, 74690-900

Goiânia, GO, Brasil

E-mail: [wendell@ufg.br](mailto:wendell@ufg.br)

ORCID: <http://orcid.org/0000-0002-4009-2291>

## Optical images and color intensities for the reagent concentrations optimization

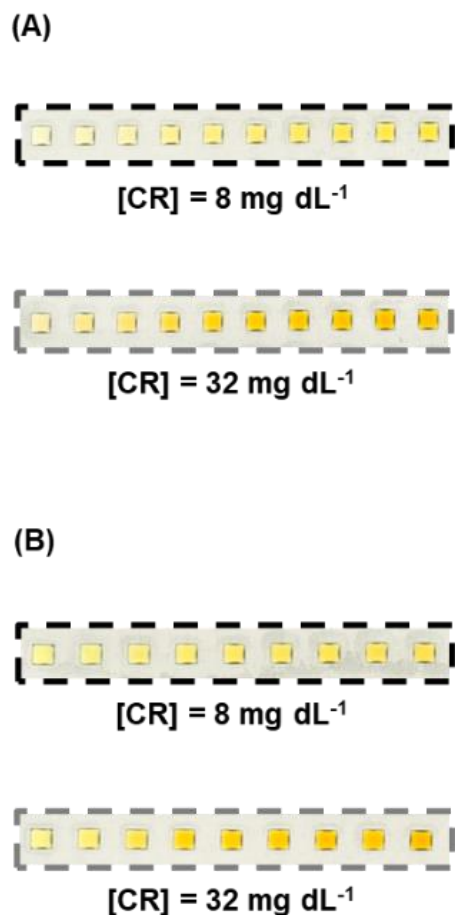

**Fig. S1** Optical images recorded for the reagent concentrations optimization. (A) Microwells of the polyester plate of a replicate of the Jaffé reaction and graph of PA concentration variation by the corresponding color intensity, with PA variation from 1 to 10 mmol L<sup>-1</sup>. (B) Microwells of the polyester plate of a replicate of the Jaffé reaction and graph of NaOH concentration variation by the corresponding color intensity, with NaOH variation from 50 to 450 mmol L<sup>-1</sup>.

### Data from Fig. 2A (main text)

[CR] = 8 mg dL<sup>-1</sup>

| [AP]<br>(mmol L <sup>-1</sup> ) | Color intensity |        |        |        | Average | Standard deviation |
|---------------------------------|-----------------|--------|--------|--------|---------|--------------------|
|                                 | 1               | 2      | 3      | 4      |         |                    |
| 2                               | 90.93           | 90.5   | 88.88  | 91.88  | 90.54   | 1.2                |
| 3                               | 121.94          | 118.68 | 125.4  | 124.14 | 122.54  | 2.9                |
| 4                               | 147.67          | 140.99 | 141.58 | 148.31 | 144.64  | 3.9                |
| 5                               | 159.22          | 158.86 | 162.39 | 161.20 | 160.42  | 1.7                |
| 6                               | 179.58          | 177.76 | 181.05 | 178.63 | 179.25  | 1.4                |
| 7                               | 184.61          | 185.25 | 183.51 | 183.50 | 184.22  | 0.9                |
| 8                               | 191.41          | 191.08 | 193.73 | 192.62 | 192.21  | 1.2                |
| 9                               | 200.13          | 200.52 | 203.79 | 202.35 | 201.70  | 1.7                |
| 10                              | 208.42          | 210.15 | 210.06 | 208.58 | 209.30  | 0.9                |

[CR] = 32 mg dL<sup>-1</sup>

| [AP]<br>(mmol L <sup>-1</sup> ) | Color intensity |        |        |        | Average | Standard deviation |
|---------------------------------|-----------------|--------|--------|--------|---------|--------------------|
|                                 | 1               | 2      | 3      | 4      |         |                    |
| 2                               | 144.49          | 147.33 | 145.70 | 147.81 | 146.335 | 1.5                |
| 3                               | 196.86          | 196.07 | 200.36 | 207.07 | 200.09  | 5.0                |
| 4                               | 231.56          | 229.83 | 229.22 | 229.57 | 230.04  | 1.0                |
| 5                               | 241.60          | 241.66 | 242.17 | 243.84 | 242.32  | 1.0                |
| 6                               | 248.53          | 247.97 | 248.91 | 250.38 | 248.95  | 1.0                |
| 7                               | 251.81          | 252.31 | 252.05 | 252.55 | 252.18  | 0.3                |
| 8                               | 252.82          | 252.94 | 252.89 | 253.26 | 252.98  | 0.2                |
| 9                               | 253.77          | 253.59 | 253.74 | 253.81 | 253.73  | 0.1                |
| 10                              | 254.39          | 254.36 | 254.35 | 254.48 | 254.39  | 0.1                |

**Data from Fig. 2B (main text)**

[CR] = 8 mg dL<sup>-1</sup>

| [NaOH]<br>(mmol L <sup>-1</sup> ) | Color intensity |        |        |        | Average | Standard deviation |
|-----------------------------------|-----------------|--------|--------|--------|---------|--------------------|
|                                   | 1               | 2      | 3      | 4      |         |                    |
| 50                                | 119.26          | 118.35 | 119.22 | 115.78 | 118.15  | 1.6                |
| 100                               | 126.06          | 123.28 | 122.97 | 125.15 | 124.36  | 1.5                |
| 150                               | 143.29          | 141.65 | 146.04 | 146.26 | 144.31  | 2.2                |
| 200                               | 160.62          | 154.95 | 159.84 | 159.11 | 158.63  | 2.5                |
| 250                               | 167.08          | 168.37 | 163.75 | 165.33 | 166.13  | 2.0                |
| 300                               | 175.69          | 171.81 | 171.76 | 174.81 | 173.52  | 2.0                |
| 350                               | 183.27          | 176.94 | 178.86 | 179.00 | 179.52  | 2.7                |
| 400                               | 183.09          | 182.72 | 184.58 | 185.03 | 183.85  | 1.1                |
| 450                               | 188.78          | 185.48 | 188.53 | 188.89 | 187.92  | 1.6                |

[CR] = 32 mg dL<sup>-1</sup>

| [NaOH]<br>(mmol L <sup>-1</sup> ) | Color intensity |        |        |        | Average | Standard deviation |
|-----------------------------------|-----------------|--------|--------|--------|---------|--------------------|
|                                   | 1               | 2      | 3      | 4      |         |                    |
| 50                                | 132.95          | 127.82 | 125.79 | 124.51 | 127.77  | 3.7                |
| 100                               | 157.79          | 156.20 | 153.87 | 155.92 | 155.94  | 1.6                |
| 150                               | 195.33          | 206.06 | 201.51 | 202.61 | 201.38  | 4.5                |
| 200                               | 232.63          | 229.17 | 232.70 | 231.11 | 231.40  | 1.7                |
| 250                               | 242.92          | 241.77 | 242.46 | 243.89 | 242.76  | 0.9                |
| 300                               | 247.58          | 247.29 | 247.39 | 248.97 | 247.81  | 0.8                |
| 350                               | 249.85          | 249.53 | 249.12 | 249.85 | 249.59  | 0.3                |
| 400                               | 251.82          | 251.11 | 251.66 | 251.24 | 251.46  | 0.3                |
| 450                               | 250.96          | 251.22 | 251.87 | 251.63 | 251.42  | 0.4                |

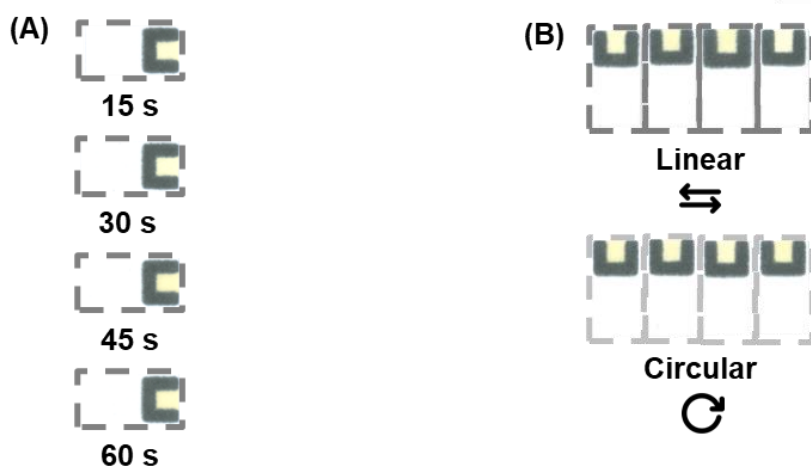

**Fig. S2** Optical images showing the captured data for the optimization of time and type of mixture. (A) PADS and graph of the variation of the mixing time in the circular model by the corresponding color intensity and (B) PADS and graph comparing the circular and linear mixture in 45 s by the corresponding color intensity.

**Data from Fig. 3A (main text)**

| Mixing time<br>(s) | Color intensity |       |       |       | Average | Standard<br>deviation |
|--------------------|-----------------|-------|-------|-------|---------|-----------------------|
|                    | 1               | 2     | 3     | 4     |         |                       |
| 15                 | 51.25           | 51.32 | 47.3  | 44.72 | 48.65   | 3.2                   |
| 30                 | 46.17           | 44.81 | 45.98 | 50.28 | 46.81   | 2.4                   |
| 45                 | 54.61           | 56.77 | 56.9  | 54.76 | 55.76   | 1.2                   |
| 60                 | 54.77           | 57.95 | 54.95 | 56.34 | 56.00   | 1.5                   |

**Data from Fig. 3B (main text)**

| Mix type | Color intensity |       |       |       | Average | Standard<br>deviation |
|----------|-----------------|-------|-------|-------|---------|-----------------------|
|          | 1               | 2     | 3     | 4     |         |                       |
| Linear   | 41.02           | 47.55 | 45.66 | 38.91 | 43.28   | 4.0                   |
| Circular | 54.61           | 56.77 | 56.9  | 54.76 | 55.76   | 1.2                   |

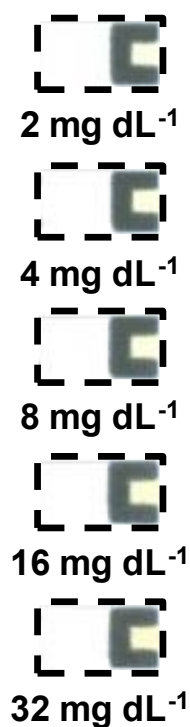

**Fig. S3** Optical images showing typical resulting images for colorimetric assays performed on DMF-PADs for different concentrations of creatinine.

**Data from Fig. 4 (main text)**

| [CR]<br>(mg dL <sup>-1</sup> ) | log [CR]<br>(mg dL <sup>-1</sup> ) | Color intensity |       |       |       | Average | Standard deviation |
|--------------------------------|------------------------------------|-----------------|-------|-------|-------|---------|--------------------|
|                                |                                    | 1               | 2     | 3     | 4     |         |                    |
| 2                              | 0.30                               | 28.26           | 29.09 | 25.75 | 26.80 | 27.47   | 1.5                |
| 4                              | 0.60                               | 34.91           | 33.86 | 33.36 | 35.21 | 34.33   | 0.9                |
| 8                              | 0.90                               | 39.25           | 36.59 | 39.05 | 41.14 | 39.01   | 1.9                |
| 16                             | 1.20                               | 48.78           | 46.21 | 48.68 | 50.23 | 48.47   | 1.7                |
| 32                             | 1.50                               | 56.65           | 54.75 | 47.34 | 53.19 | 52.98   | 4.0                |

**Data from Fig. 5 (main text)**  
**DMF**

| [CR]* | Color intensity |       |       | Average | Standard deviation | Log [CR] | [CR]* diluted | [CR]* | Recovery (%) |
|-------|-----------------|-------|-------|---------|--------------------|----------|---------------|-------|--------------|
|       | 1               | 2     | 3     |         |                    |          |               |       |              |
| 30    | 39.17           | 37.85 | 36.57 | 37.86   | 1.3                | 0.77     | 5.9           | 31.6  | 105          |
| 75    | 45.95           | 47.12 | 45.99 | 46.35   | 0.7                | 1.16     | 14.3          | 76.4  | 102          |
| 150   | 52.53           | 53.55 | 54.57 | 53.55   | 0.7                | 1.48     | 30.3          | 161.8 | 108          |
| 225   | 54.81           | 58.27 | 59.15 | 57.41   | 2.3                | 1.66     | 45.3          | 241.9 | 107          |
| 300   | 60.38           | 61.51 | 55.3  | 59.06   | 3.3                | 1.73     | 53.9          | 287.3 | 96           |

\* mg dL<sup>-1</sup>

**UV-Vis**

| [CR]*   | Absorbance |        |            | [CR]*  | Average | Standard deviation | Recovery (%) |
|---------|------------|--------|------------|--------|---------|--------------------|--------------|
|         | 30 s       | 5 min  | Difference |        |         |                    |              |
| Control |            | 0.2709 | 0.4565     | 0.1856 |         |                    |              |
| 30      | 1          | 0.1955 | 0.2480     | 0.0525 | 28.3    | 29.3               | 1.9          |
|         | 2          | 0.2177 | 0.2700     | 0.0523 | 28.2    |                    |              |
|         | 3          | 0.1783 | 0.2369     | 0.0586 | 31.6    |                    |              |
| 75      | 1          | 0.2504 | 0.3926     | 0.1422 | 76.6    | 74.5               | 2.8          |
|         | 2          | 0.2609 | 0.3933     | 0.1324 | 71.3    |                    |              |
|         | 3          | 0.2252 | 0.3653     | 0.1401 | 75.5    |                    |              |
| 150     | 1          | 0.2702 | 0.5565     | 0.2863 | 154.3   | 152.9              | 6.0          |
|         | 2          | 0.2756 | 0.5471     | 0.2715 | 146.3   |                    |              |
|         | 3          | 0.2412 | 0.5348     | 0.2936 | 158.2   |                    |              |
| 225     | 1          | 0.3158 | 0.7281     | 0.4123 | 222.1   | 222.3              | 2.3          |
|         | 2          | 0.3062 | 0.7231     | 0.4169 | 224.6   |                    |              |
|         | 3          | 0.2896 | 0.6982     | 0.4086 | 220.2   |                    |              |
| 300     | 1          | 0.3516 | 0.8921     | 0.5405 | 291.2   | 285.6              | 6.8          |
|         | 2          | 0.3526 | 0.8687     | 0.5161 | 278.1   |                    |              |
|         | 3          | 0.3167 | 0.8504     | 0.5337 | 287.6   |                    |              |

\* mg dL<sup>-1</sup>

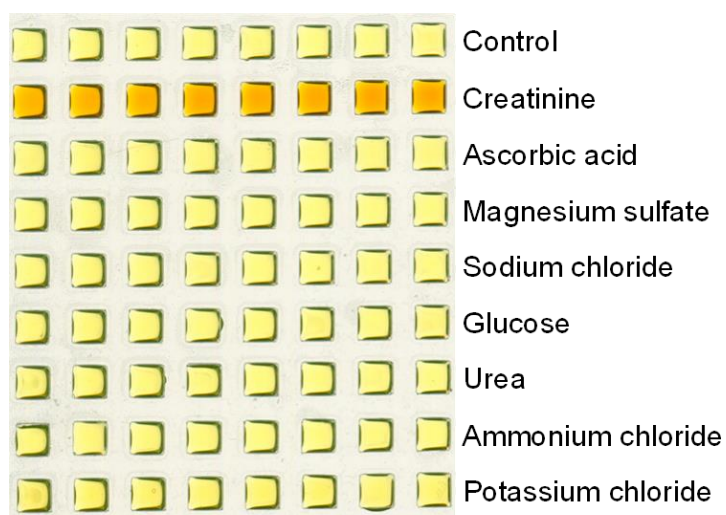

**Fig. S4** Optical images for the selectivity study.

**Raw data for the interfering study (see Fig S6 in the ESI)**

| Interferers        | Color intensity |       |       |       |       |       |       |       | Average | Standard deviation |
|--------------------|-----------------|-------|-------|-------|-------|-------|-------|-------|---------|--------------------|
|                    | 1               | 2     | 3     | 4     | 5     | 6     | 7     | 8     |         |                    |
| Control            | 255.0           | 255.0 | 255.0 | 255.0 | 254.8 | 254.7 | 254.5 | 254.7 | 254.8   | 0.2                |
| Creatinine         | 255.0           | 255.0 | 255.0 | 255.0 | 254.8 | 254.7 | 254.5 | 254.7 | 254.8   | 0.2                |
| Ascorbic acid      | 143.3           | 143.6 | 142.7 | 147.6 | 147.3 | 148.6 | 149.9 | 150.0 | 146.6   | 3.0                |
| Magnesium sulfate  | 142.3           | 141.8 | 144.1 | 145.1 | 145.8 | 146.4 | 147.3 | 146.1 | 144.9   | 2.0                |
| Sodium chloride    | 142.3           | 142.6 | 142.7 | 144.3 | 145.0 | 145.3 | 145.3 | 146.6 | 144.3   | 1.5                |
| Glucose            | 152.2           | 151.0 | 151.8 | 149.3 | 142.9 | 148.4 | 150.8 | 151.3 | 149.7   | 3.0                |
| Urea               | 154.6           | 152.7 | 150.3 | 152.0 | 144.0 | 142.5 | 142.2 | 140.9 | 147.4   | 5.5                |
| Ammonium chloride  | 161.9           | 151.4 | 149.0 | 147.6 | 144.9 | 145.1 | 146.5 | 144.4 | 148.8   | 5.8                |
| Potassium chloride | 173.6           | 167.5 | 162.4 | 159.0 | 162.9 | 161.1 | 157.1 | 159.7 | 159.2   | 5.3                |

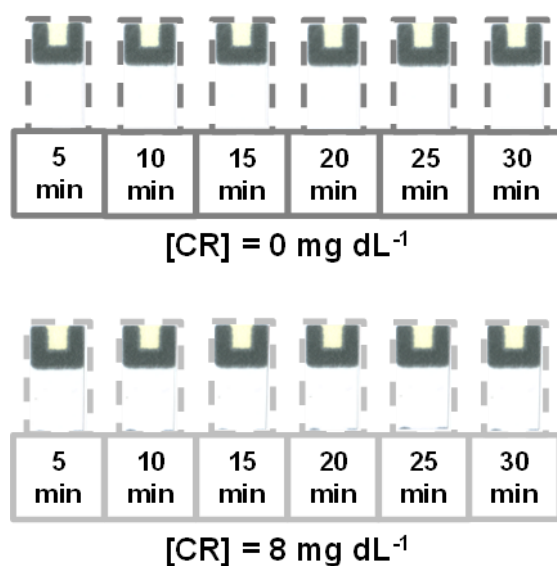

**Fig. S5** Optical images recorded on PADs for the image acquisition time optimization.

**Data from Fig. S7 (ESI)**

[CR] = 0 mg dL<sup>-1</sup>

| Image acquisition time (min) | Color intensity |       |       |       | Average | Standard deviation |
|------------------------------|-----------------|-------|-------|-------|---------|--------------------|
|                              | 1               | 2     | 3     | 4     |         |                    |
| 5                            | 24.71           | 24.15 | 27.99 | 29.62 | 26.62   | 2.6                |
| 10                           | 25.28           | 24.26 | 27.47 | 27.68 | 26.17   | 1.7                |
| 15                           | 25.46           | 24.81 | 27.85 | 27.78 | 26.47   | 1.6                |
| 20                           | 26.12           | 24.95 | 28.61 | 28.52 | 27.05   | 1.8                |
| 25                           | 26.13           | 25.15 | 29.24 | 29.34 | 27.46   | 2.1                |
| 30                           | 26.48           | 25.12 | 29.72 | 29.72 | 27.76   | 2.3                |

[CR] = 8 mg dL<sup>-1</sup>

| Image acquisition time (min) | Color intensity |       |       |       | Average | Standard deviation |
|------------------------------|-----------------|-------|-------|-------|---------|--------------------|
|                              | 1               | 2     | 3     | 4     |         |                    |
| 5                            | 39.25           | 36.59 | 39.05 | 41.14 | 39.01   | 1.9                |
| 10                           | 39.33           | 36.28 | 38.31 | 39.8  | 38.43   | 1.6                |
| 15                           | 39.83           | 36.99 | 38.56 | 40.79 | 39.04   | 1.6                |
| 20                           | 40.3            | 37.28 | 38.5  | 41.25 | 39.33   | 1.8                |
| 25                           | 40.46           | 36.99 | 38.65 | 41.42 | 39.38   | 2.0                |
| 30                           | 40.2            | 36.85 | 38.34 | 41.42 | 39.20   | 2.0                |
